# Supplementary material
Source: publisher site journal article supplement (https://www.dovepress.com/article/338128)
Supplement: Supplementary file 1 [file get_supplementary_file.php]

**Appendix 1**

**Question guides – Focus Group Discussions**

**For Patients**

1. To begin, can you tell me your experience of obtaining a cancer diagnosis? *[Perceptions on diagnosis of the disease]*
2. Can you describe the cancer care facilities that were or are available and accessible in and around Moree? *[Information on the availability of cancer care facilities in the selected rural location]*
3. What about your general health – do you have other health conditions? How have these affected your treatment for cancer? *[Problems associated with physical co-morbidities, which affect treatment]*
4. **Can you discuss some of the factors that affected how you accessed treatment? Can you identify any barriers or challenges you face in accessing and completing treatment? *[Factors influencing access to treatment and perceptions of barriers and challenges* (**in terms of cost, distance, overall convenience, help of caretaker, fear of treatment, side effects, duration of treatment, etc)]
5. You’ve talked about some of the barriers you face – can you identify some suggestions that you think would improve access to cancer treatment in Moree and surrounds? *[Suggestions to improve the access for treatment]*

**For caregivers**

1. To begin, can you tell me your experience of supporting someone to obtain an initial cancer diagnosis?

*[Perceptions on diagnosis of the disease]*

1. Can you describe the cancer care facilities that were or are available and accessible in and around [Tamworth/Moree]?

*[Information on the availability of cancer care facilities in the selected rural location]*

1. **Can you discuss some of the factors that affected how you supported your spouse to access cancer treatment?**

**Can you identify any barriers or challenges you personally felt you faced when supporting the person to access and complete treatment?**

***[Factors influencing access to treatment and perceptions of barriers and challenges* (**in terms of cost, distance, overall convenience, help of caretaker, fear of treatment, side effects, duration of treatment, etc)]

1. What about general health issues that your spouse might have been facing – do they have other health conditions?

How have these affected your support for them, and how they have accessed treatment for cancer?

*[Problems associated with physical co-morbidities, which affect treatment]*

1. You’ve talked about some of the barriers and challenges you’ve faced as a caregiver – can you identify some suggestions that you think would improve the experience of providing support to someone accessing cancer treatment in [Tamworth/Moree] and surrounds?

*[Suggestions to improve the access for treatment]*

**For health professionals**

1. To begin, can you tell me your experience of supporting/treating patients in the Tamworth region to obtain a cancer diagnosis?

[Prompt: What is the typical process and timeframe?]

*[Perceptions on diagnosis of the disease]*

1. Can you describe the cancer care facilities that you would normally encounter or deal with in and around Tamworth region?

*[Information on the availability of cancer care facilities in the selected rural location]*

1. **Can you discuss some of the factors that affected how you identified appropriate treatment for the patient?**

**Can you identify any barriers or challenges you face as a health professional, in identifying and supporting patients’ access to treatment?**

***[Factors influencing access to treatment and perceptions of barriers and challenges* (**in terms of cost, distance, overall convenience, help of caretaker, fear of treatment, side effects, duration of treatment, other factors specific to health professionals’ experience, etc)]

1. Can you talk a little about patients’ general health – what is the prevalence of comorbidities among the geriatric oncology patients you generally see?

How have these affected your approach to these patients, and their treatment for cancer?

*[Problems associated with physical co-morbidities, which may affect treatment approach]*

1. You’ve talked about some of the barriers you and your patients face – can you identify some suggestions that you think would improve access to cancer treatment in Tamworth and surrounds?

*[Suggestions to improve the access for treatment]*

**Appendix 2**

Comorbidities Study 2018-19

Nodes

| Name | Description |
| --- | --- |
| Access to information | Access to information about diagnosis (e.g. tests), treatment, support options and related logistics |
| Access to information about support options & admin tasks |  |
| Access to information relating to treatment | Access to information relating to treatment, including associated elements - e.g. accommodation, financial aspects, etc. |
| Availability of cancer care facilities |  |
| Experience of other support options | Experience of other support options such as the Cancer Council, peer/patient support groups, etc. |
| Negative exp - facilities inc equipt and proximity |  |
| Negative exp - Staff & clinicians |  |
| Positive exp - facilities inc equipt & proximity |  |
| Positive exp - Staff & clinicians |  |
| Comment on age in relation to diagnosis or treatment |  |
| Comment on family situation | Comment by patients, caregivers or health professionals regarding family situations/scenarios and their impact on a patient's experience of cancer and related decisions |
| Financial hardship or challenges |  |
| Factors impacting experience of diagnosis or treatment (caregiver) |  |
| Practical aspects of treatment experience for caregivers |  |
| Social and emotional aspects of treatment experience for caregivers |  |
| Factors influencing experience of treatment (patient) | Factors influencing experience (positive and/or negative) of treatment, including access to information ahead of time, related therapies provided by hospital staff or elsewhere, side effects of treatment, difficulties re. treatment decisions, etc. |
| Aspects of facilities and accessing treatment | Aspects including proximity, ease of access, types of tests/scans available, and processes involved in accessing facilities and/or tests and/or treatment |
| Family situation or support | Comments by or about patient in relation to family support, family situation/circumstances - including social, emotional, geographical isolation, finances |
| Pain management and palliative care |  |
| Self-care and self-image | Comments relating to care of self, how patient or family members responds to having cancer, and the perceived significance of this in the person's experience of cancer and cancer treatment |
| Side-effects and aspects of treatment |  |
| Factors influencing treatment - access, experience, commencement |  |
| Cost of travel and accommodation |  |
| Cost of treatment and therapies |  |
| Difficulties involved in travel | Difficulties involved in travel required for diagnostic tests (e.g. PET scans) and/or treatment, including length of travel, problems or challenges with accommodation, etc. |
| Other |  |
| Personal or family factors | Family situation (immediate or extended), specific personal factors, and/or particular financial circumstances faced by the household of which the participant is a part |
| Regional location impacts |  |
| Staffing impacts on treatment |  |
| Type of treatment or tests required |  |
| Impact of comorbidities on treatment & diagnosis |  |
| Impact on diagnosis |  |
| Impact on doctor's perceptions |  |
| Impact on treatment |  |
| No comorbidities noted |  |
| No impact of existing comorbidities |  |
| Other impact inc on QoL |  |
| Observations or comments on cancer experience - self or family | General comments about the patient's experience of having a cancer diagnosis, seeking and having treatment; including impacts on family members (any such comments that don't neatly fit with other nodes); community and social network aspects of the experience |
| Perceptions of diagnosis | Perceptions of process of obtaining a diagnosis, including elements of GP and specialist care, any delays, etc. Also includes perceptions/responses to ongoing tests and scans throughout treatment phase and in follow-up (emotional impacts esp.) |
| Delays or complications in diagnosis |  |
| Emotional aspects of diagnosis |  |
| Health professional perspectives | Health professional perspectives on process of diagnosis |
| Issues relating to health professionals | Any issues identified by participants in relation to health professionals' response to patient's condition, referral pathway, perceived/actual delays, etc. |
| Straightforward and or rapid diagnosis |  |
| Suggestions for improvement |  |
| Facilities- and equipt-related |  |
| Other |  |
| Staffing-related |  |
